# Supplementary material for: Higher-order clinical risk factor interaction analysis for overall mortality in maintenance hemodialysis patients
Source: PubMed Central journal article supplement — Ther Adv Chronic Dis. 2020 Sep 29;11:2040622320949060. doi: 10.1177/2040622320949060 (PMC7534064; doi:10.1177/2040622320949060), 2020-09-29
Supplement: 20200710-TACD-MDRER-HD_Supplementary_material_Final.pdf [file 20200710-TACD-MDRER-HD_Supplementary_material_Final.pdf]

# Supplementary materials

Supplementary Figure S1. MDR-based MDR-ER flowchart.

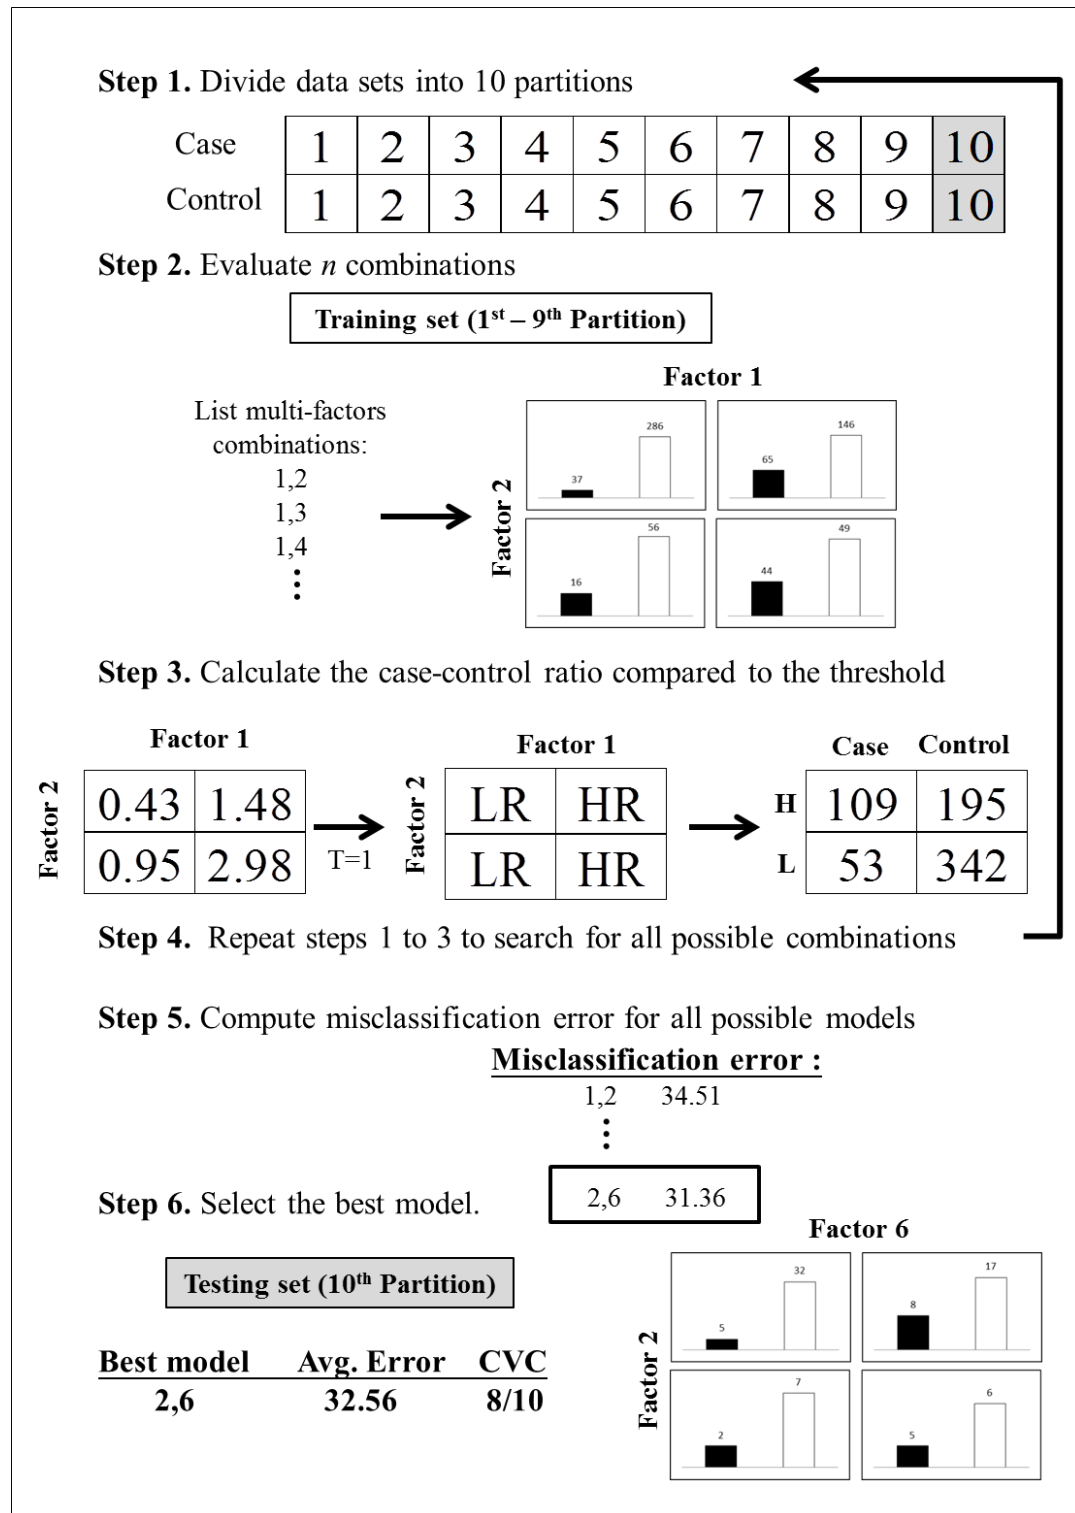

Supplementary Table S1. Clinical characteristic distribution according to the overall survival status in hemodialysis patients.

| Variables                                   | Mortality (-) |       | Mortality (+) |       | P*      |
|---------------------------------------------|---------------|-------|---------------|-------|---------|
|                                             | n             | %     | n             | %     |         |
| Sex                                         |               |       |               |       | 0.544   |
| Male                                        | 272           | 45.41 | 78            | 42.86 |         |
| Female                                      | 327           | 54.59 | 104           | 57.14 |         |
| DM                                          |               |       |               |       | < 0.001 |
| No                                          | 481           | 80.3  | 115           | 63.19 |         |
| Yes                                         | 118           | 19.7  | 67            | 36.81 |         |
| Age (years)                                 |               |       |               |       | < 0.001 |
| < 61.59                                     | 381           | 63.61 | 60            | 32.97 |         |
| ≥ 61.59                                     | 218           | 36.39 | 122           | 67.03 |         |
| Hemodialysis vintage (years)                |               |       |               |       | 0.804   |
| < 7.49                                      | 379           | 63.27 | 117           | 64.29 |         |
| ≥ 7.49                                      | 220           | 36.73 | 65            | 35.71 |         |
| Hemoglobin (Hgb, g/dL)                      |               |       |               |       | < 0.001 |
| < 10.48                                     | 260           | 43.41 | 114           | 62.64 |         |
| ≥ 10.48                                     | 339           | 56.59 | 68            | 37.36 |         |
| White blood cell (WBC, 10 <sup>3</sup> /μL) |               |       |               |       | 0.177   |
| < 6.19                                      | 366           | 61.10 | 101           | 55.49 |         |
| ≥ 6.19                                      | 233           | 38.90 | 81            | 44.51 |         |
| Platelet (10 <sup>3</sup> /μL)              |               |       |               |       | 0.637   |
| < 195                                       | 341           | 56.93 | 100           | 54.95 |         |
| ≥ 195                                       | 258           | 43.07 | 82            | 45.05 |         |
| Albumin (g/dL)                              |               |       |               |       | < 0.001 |
| ≥ 3.76                                      | 428           | 71.45 | 66            | 36.26 |         |
| < 3.76                                      | 171           | 28.55 | 116           | 63.74 |         |
| Ferritin (Fe, ng/cc)                        |               |       |               |       | 0.001   |
| < 415.48                                    | 319           | 53.26 | 71            | 39.01 |         |
| ≥ 415.48                                    | 280           | 46.74 | 111           | 60.99 |         |
| Blood urea nitrogen (BUN, mg/dL)            |               |       |               |       | 0.079   |
| < 68.77                                     | 278           | 46.41 | 98            | 53.85 |         |
| ≥ 68.77                                     | 321           | 53.59 | 84            | 46.15 |         |
| Creatinine (Cr, mg/dL)                      |               |       |               |       | < 0.001 |
| ≥ 10.65                                     | 330           | 55.09 | 58            | 31.87 |         |
| < 10.65                                     | 269           | 44.91 | 124           | 68.13 |         |
| Potassium (K, meq/L)                        |               |       |               |       | 0.045   |
| < 5                                         | 314           | 52.42 | 80            | 43.96 |         |
| ≥ 5                                         | 285           | 47.58 | 102           | 56.04 |         |
| Corrected serum calcium (Ca, mg/dL)         |               |       |               |       | 0.368   |
| < 9.53                                      | 319           | 53.26 | 90            | 49.45 |         |
| ≥ 9.53                                      | 280           | 46.74 | 92            | 50.55 |         |
| Phosphorus (P, mg/dL)                       |               |       |               |       | 0.158   |
| < 5                                         | 309           | 51.59 | 83            | 45.60 |         |
| ≥ 5                                         | 290           | 48.41 | 99            | 54.40 |         |
| Urea Reduction Ratio (URR)                  |               |       |               |       | 0.056   |
| < 0.74                                      | 245           | 40.90 | 89            | 48.90 |         |
| ≥ 0.74                                      | 354           | 59.10 | 93            | 51.10 |         |
| Kt/V urea-Daugirdas score                   |               |       |               |       | 0.004   |
| < 1.7                                       | 286           | 47.75 | 65            | 35.71 |         |
| ≥ 1.7                                       | 313           | 52.25 | 117           | 64.29 |         |
| Cardiothoracic ratio (CT ratio)             |               |       |               |       | < 0.001 |
| < 0.51                                      | 386           | 64.44 | 74            | 40.66 |         |
| ≥ 0.51                                      | 213           | 35.56 | 108           | 59.34 |         |
| Parathyroid hormone (PTH, pg/mL)            |               |       |               |       | 0.129   |
| < 402.06                                    | 371           | 61.94 | 124           | 68.13 |         |
| ≥ 402.06                                    | 228           | 38.06 | 58            | 31.87 |         |

\*P-value were estimated from  $\chi^2$  test.

Supplementary Table S2. Dichotomize values of the continuous spectrum according to different statistical inferences.

| Variables                    | K-means | Median | Mean   |
|------------------------------|---------|--------|--------|
| Age                          | 61.59   | 59.00  | 59.29  |
| Hemodialysis vintage         | 7.49    | 4.84   | 6.27   |
| Hemoglobin (Hgb)             | 10.48   | 10.54  | 10.61  |
| White blood cell (WBC)       | 6.90    | 5.90   | 6.19   |
| Platelet                     | 195.00  | 190.00 | 192.87 |
| Albumin                      | 3.76    | 3.85   | 3.82   |
| Ferritin (Fe)                | 478.92  | 415.48 | 452.21 |
| Blood urea nitrogen (BUN)    | 68.77   | 69.40  | 69.91  |
| Creatinine (Cr)              | 10.31   | 10.65  | 10.72  |
| Potassium (K)                | 4.90    | 5.00   | 4.94   |
| Corrected serum calcium (Ca) | 9.53    | 9.46   | 9.50   |
| Phosphorus (P)               | 4.98    | 5.00   | 5.04   |
| URR                          | 0.74    | 0.75   | 0.75   |
| Kt/v                         | 1.67    | 1.66   | 1.70   |
| Cardiothoracic (CT) ratio    | 0.51    | 0.50   | 0.50   |
| Parathyroid hormone (PTH)    | 404.58  | 277.82 | 402.06 |

Supplementary Table S3. Dichotomous results of the continuous spectrum using ROC analysis.

| Variables                    | Methods | AUC*         | 95% CI |      |
|------------------------------|---------|--------------|--------|------|
| Age                          | K-means | <b>0.653</b> | 0.61   | 0.69 |
|                              | Median  | 0.651        | 0.61   | 0.69 |
|                              | Mean    | 0.646        | 0.61   | 0.68 |
| Hemodialysis vintage         | K-means | 0.438        | 0.4    | 0.48 |
|                              | Median  | 0.417        | 0.38   | 0.46 |
|                              | Mean    | <b>0.444</b> | 0.4    | 0.48 |
| Hemoglobin (Hgb)             | K-means | <b>0.404</b> | 0.36   | 0.44 |
|                              | Median  | 0.402        | 0.36   | 0.44 |
|                              | Mean    | 0.403        | 0.36   | 0.44 |
| White blood cell (WBC)       | K-means | 0.476        | 0.44   | 0.51 |
|                              | Median  | 0.482        | 0.44   | 0.52 |
|                              | Mean    | <b>0.489</b> | 0.45   | 0.53 |
| Platelet                     | K-means | <b>0.472</b> | 0.43   | 0.51 |
|                              | Median  | 0.464        | 0.42   | 0.51 |
|                              | Mean    | 0.469        | 0.43   | 0.51 |
| Albumin                      | K-means | <b>0.676</b> | 0.64   | 0.72 |
|                              | Median  | 0.651        | 0.61   | 0.69 |
|                              | Mean    | 0.668        | 0.63   | 0.71 |
| Ferritin (Fe)                | K-means | 0.555        | 0.51   | 0.6  |
|                              | Median  | <b>0.571</b> | 0.53   | 0.61 |
|                              | Mean    | 0.565        | 0.52   | 0.61 |
| Blood urea nitrogen (BUN)    | K-means | <b>0.463</b> | 0.42   | 0.5  |
|                              | Median  | 0.460        | 0.42   | 0.5  |
|                              | Mean    | 0.457        | 0.42   | 0.5  |
| Creatinine (Cr)              | K-means | 0.385        | 0.34   | 0.43 |
|                              | Median  | <b>0.387</b> | 0.35   | 0.43 |
|                              | Mean    | 0.385        | 0.35   | 0.42 |
| Potassium (K)                | K-means | 0.443        | 0.4    | 0.48 |
|                              | Median  | <b>0.458</b> | 0.42   | 0.5  |
|                              | Mean    | 0.455        | 0.41   | 0.5  |
| Corrected serum calcium (Ca) | K-means | <b>0.519</b> | 0.48   | 0.56 |
|                              | Median  | 0.513        | 0.47   | 0.55 |
|                              | Mean    | 0.517        | 0.47   | 0.56 |
| Phosphorus (P)               | K-means | 0.470        | 0.43   | 0.51 |
|                              | Median  | <b>0.470</b> | 0.43   | 0.51 |
|                              | Mean    | 0.467        | 0.43   | 0.51 |
| URR                          | K-means | <b>0.453</b> | 0.41   | 0.49 |
|                              | Median  | 0.450        | 0.41   | 0.49 |
|                              | Mean    | 0.450        | 0.41   | 0.49 |
| Kt/v                         | K-means | 0.549        | 0.51   | 0.59 |
|                              | Medians | 0.556        | 0.52   | 0.6  |
|                              | Mean    | <b>0.560</b> | 0.52   | 0.6  |
| Cardiothoracic (CT) ratio    | K-means | <b>0.619</b> | 0.58   | 0.66 |
|                              | Median  | 0.612        | 0.57   | 0.65 |
|                              | Mean    | 0.611        | 0.57   | 0.65 |
| Parathyroid hormone (PTH)    | K-means | 0.467        | 0.43   | 0.51 |
|                              | Median  | 0.464        | 0.42   | 0.51 |
|                              | Mean    | <b>0.469</b> | 0.43   | 0.51 |

Bold font indicates the best AUC estimated from ROC analysis.
